# Supplementary material for: An Investigation about Gene Modules Associated with hDPSC Differentiation for Adolescents
Source: Hindawi journal article supplement (doi:10.1155/2019/8913287), 2019-04-04
Supplement: f1 [file 8913287.f1.zip]

**S4 Table. There were 7 genes up-regulated at P10 in the salmon module.**

| <b>userid</b> | <b>Gene Symbol</b> | <b>Gene Name</b>                                  | <b>Entrez Gene</b> |
|---------------|--------------------|---------------------------------------------------|--------------------|
| 203414_at     | MMD                | monocyte to macrophage differentiation associated | 23531              |
| 221395_at     | TAS2R13            | taste 2 receptor member 13                        | 50838              |
| 221322_at     | NPVF               | neuropeptide VF precursor                         | 64111              |
| 221833_at     | LONP2              | lon peptidase 2, peroxisomal                      | 83752              |
| 200916_at     | TAGLN2             | transgelin 2                                      | 8407               |
| 203547_at     | CD4                | CD4 molecule                                      | 920                |
| 203069_at     | SV2A               | synaptic vesicle glycoprotein 2A                  | 9900               |
