# Supplementary material for: An Investigation about Gene Modules Associated with hDPSC Differentiation for Adolescents
Source: Hindawi journal article supplement (doi:10.1155/2019/8913287), 2019-04-04
Supplement: f1 [file 8913287.f1.zip]

S2 Fig. Scatter plots of the top 2 principal components (pca plot).

A

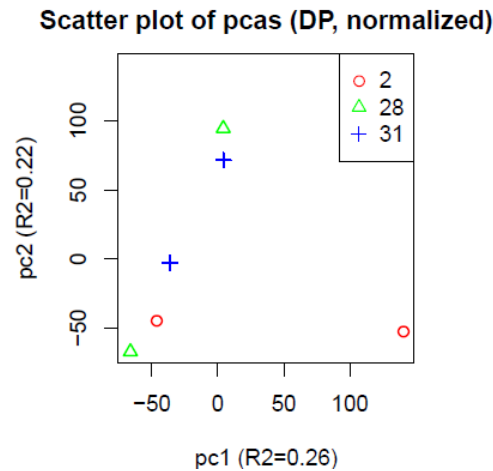

B

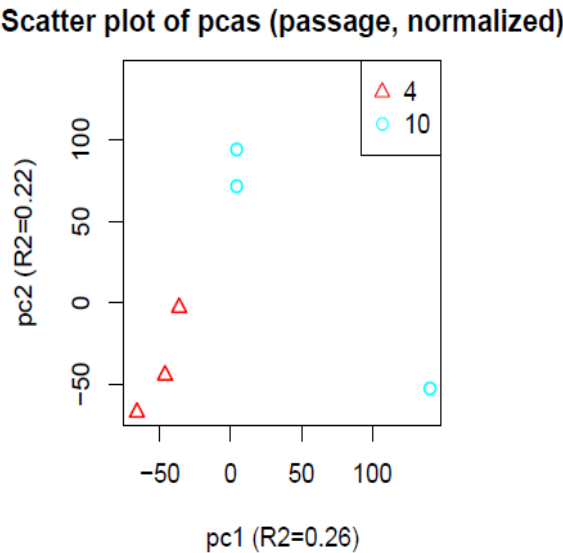

C

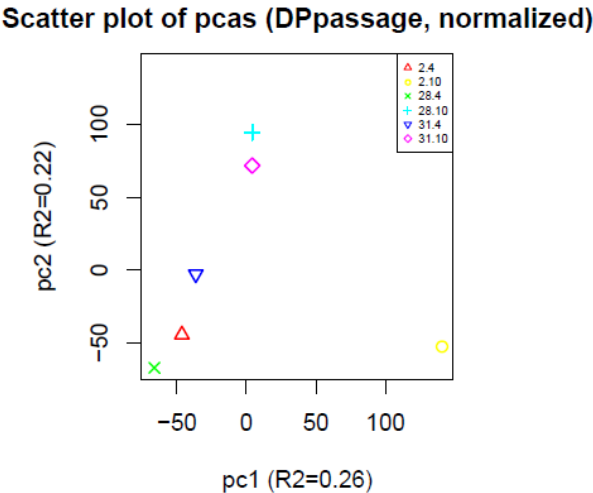

They were operated after log2 transformation and quantile normalization. (A) is the pca plot with arrays colored with the crown-completed stage (2,28,31 separately). (B) is the pca plot with arrays colored with passage (4,10). P4 samples and P10 samples are separated in the pca plot. (C) is the pca plot with arrays colored with the combination of stage and passage.
