# Supplementary material for: An Investigation about Gene Modules Associated with hDPSC Differentiation for Adolescents
Source: Hindawi journal article supplement (doi:10.1155/2019/8913287), 2019-04-04
Supplement: f1 [file 8913287.f1.zip]

**S1 Fig. The plots of quantiles across arrays.**

**A**

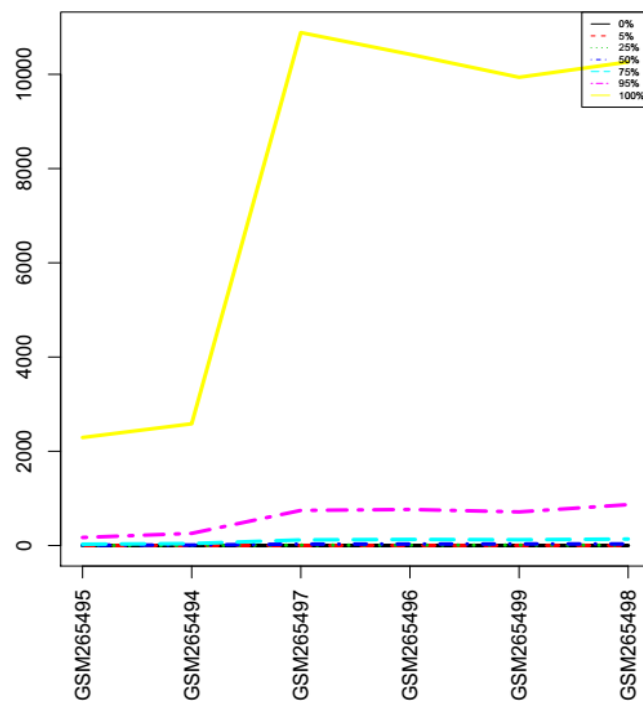

**B**

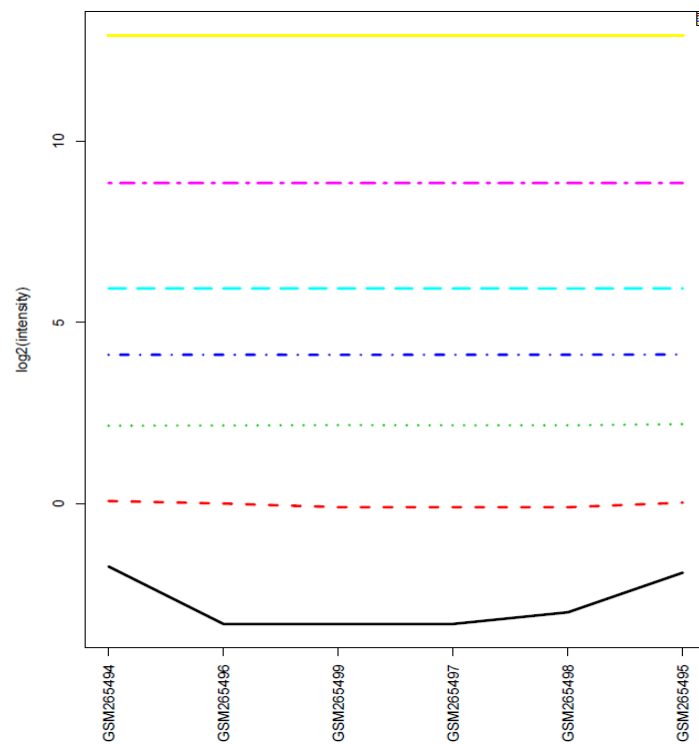

(A) is for the original data. (B) is for the log2 transformed and quantile normalized expression data.
