# Supplementary material for: An Investigation about Gene Modules Associated with hDPSC Differentiation for Adolescents
Source: Hindawi journal article supplement (doi:10.1155/2019/8913287), 2019-04-04
Supplement: f1 [file 8913287.f1.zip]

**S2 Table. The enriched 1 KEGG pathways for the salmon module.**

| PathwayName                    | #Gene | Statistics                                      |
|--------------------------------|-------|-------------------------------------------------|
| Neurotrophin signaling pathway | 9     | C=127;O=9;E=2.18;R=4.12;rawP=0.0004;adjP=0.0456 |
