# Supplementary material for: An Investigation about Gene Modules Associated with hDPSC Differentiation for Adolescents
Source: Hindawi journal article supplement (doi:10.1155/2019/8913287), 2019-04-04
Supplement: f1 [file 8913287.f1.zip]

**S5 Fig. Scatterplots of Gene Significance (GS) for weight vs. Module Membership (MM) in the yellow and salmon modules.**

**A**

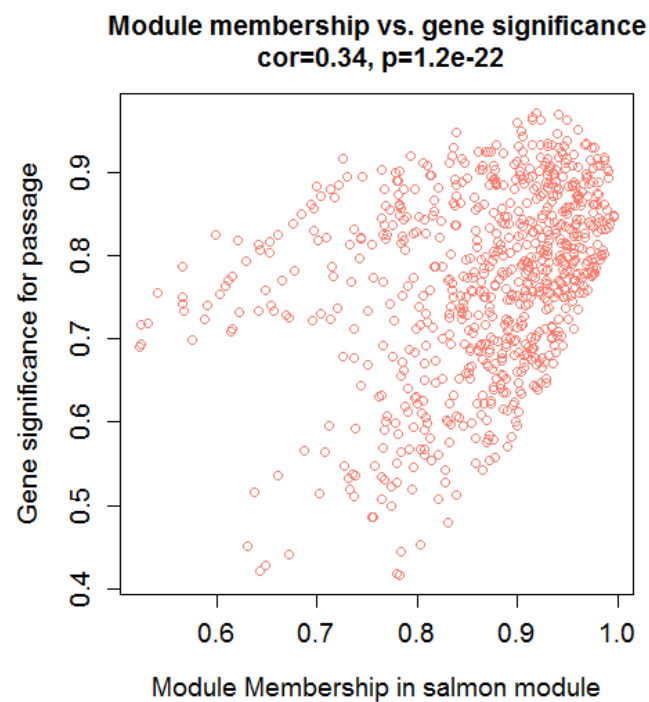

**B**

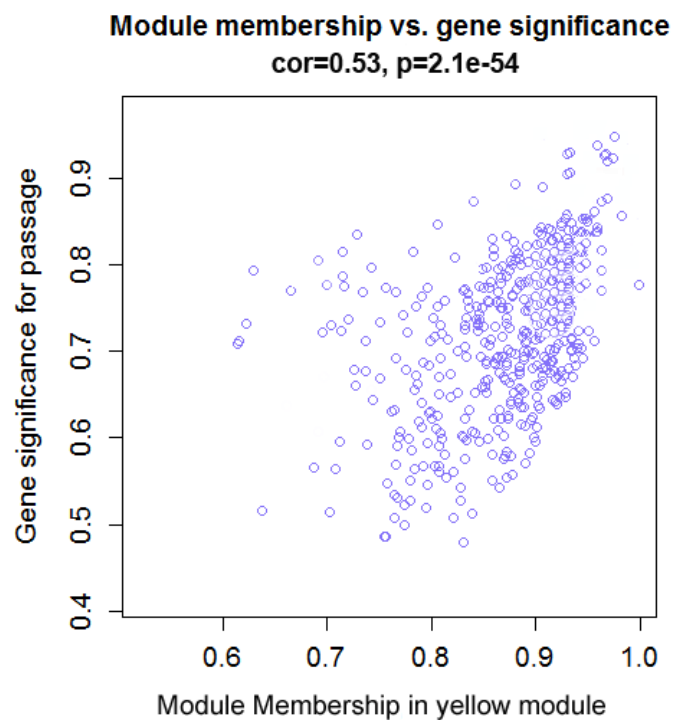

There is a highly significant correlation between GS and MM in these two modules.
