# Supplementary material for: An Investigation about Gene Modules Associated with hDPSC Differentiation for Adolescents
Source: Hindawi journal article supplement (doi:10.1155/2019/8913287), 2019-04-04
Supplement: f1 [file 8913287.f1.zip]

**S1 Table. The enriched 58 KEGG pathways for the yellow module.**

| PathwayName                                            | # Gene | Statistics                                             |
|--------------------------------------------------------|--------|--------------------------------------------------------|
| Metabolic pathways                                     | 86     | C=1130;O=86;E=44.62;R=1.93;rawP=6.66e-09;adjP=1.15e-06 |
| Pathways in cancer                                     | 34     | C=326;O=34;E=12.87;R=2.64;rawP=3.13e-07;adjP=2.20e-05  |
| Focal adhesion                                         | 25     | C=200;O=25;E=7.90;R=3.17;rawP=4.03e-07;adjP=2.20e-05   |
| Wnt signaling pathway                                  | 21     | C=150;O=21;E=5.92;R=3.55;rawP=5.12e-07;adjP=2.20e-05   |
| ECM-receptor interaction                               | 14     | C=85;O=14;E=3.36;R=4.17;rawP=5.84e-06;adjP=0.0001      |
| Hypertrophic cardiomyopathy (HCM)                      | 14     | C=83;O=14;E=3.28;R=4.27;rawP=4.37e-06;adjP=0.0001      |
| Axon guidance                                          | 18     | C=129;O=18;E=5.09;R=3.53;rawP=3.42e-06;adjP=0.0001     |
| Phagosome                                              | 19     | C=153;O=19;E=6.04;R=3.14;rawP=1.05e-05;adjP=0.0002     |
| Regulation of actin cytoskeleton                       | 23     | C=213;O=23;E=8.41;R=2.73;rawP=1.38e-05;adjP=0.0003     |
| Cell adhesion molecules (CAMs)                         | 17     | C=133;O=17;E=5.25;R=3.24;rawP=2.06e-05;adjP=0.0004     |
| Insulin signaling pathway                              | 17     | C=138;O=17;E=5.45;R=3.12;rawP=3.34e-05;adjP=0.0004     |
| MAPK signaling pathway                                 | 26     | C=268;O=26;E=10.58;R=2.46;rawP=2.62e-05;adjP=0.0004    |
| Adherens junction                                      | 12     | C=73;O=12;E=2.88;R=4.16;rawP=2.73e-05;adjP=0.0004      |
| Protein processing in endoplasmic reticulum            | 19     | C=165;O=19;E=6.52;R=2.92;rawP=3.08e-05;adjP=0.0004     |
| Arrhythmogenic right ventricular cardiomyopathy (ARVC) | 12     | C=74;O=12;E=2.92;R=4.11;rawP=3.14e-05;adjP=0.0004      |
| Dilated cardiomyopathy                                 | 13     | C=90;O=13;E=3.55;R=3.66;rawP=5.25e-05;adjP=0.0006      |
| Small cell lung cancer                                 | 12     | C=85;O=12;E=3.36;R=3.58;rawP=0.0001;adjP=0.0010        |
| Neurotrophin signaling pathway                         | 15     | C=127;O=15;E=5.01;R=2.99;rawP=0.0002;adjP=0.0019       |

|                                          |    |                                                  |
|------------------------------------------|----|--------------------------------------------------|
| Endocytosis                              | 19 | C=201;O=19;E=7.94;R=2.39;rawP=0.0004;adjP=0.0034 |
| Viral myocarditis                        | 10 | C=70;O=10;E=2.76;R=3.62;rawP=0.0004;adjP=0.0034  |
| TGF-beta signaling pathway               | 11 | C=84;O=11;E=3.32;R=3.32;rawP=0.0005;adjP=0.0041  |
| ErbB signaling pathway                   | 11 | C=87;O=11;E=3.44;R=3.20;rawP=0.0006;adjP=0.0045  |
| N-Glycan biosynthesis                    | 8  | C=49;O=8;E=1.93;R=4.13;rawP=0.0006;adjP=0.0045   |
| Circadian rhythm - mammal                | 5  | C=22;O=5;E=0.87;R=5.76;rawP=0.0014;adjP=0.0100   |
| Pathogenic Escherichia coli infection    | 8  | C=56;O=8;E=2.21;R=3.62;rawP=0.0015;adjP=0.0103   |
| Renal cell carcinoma                     | 9  | C=70;O=9;E=2.76;R=3.26;rawP=0.0017;adjP=0.0104   |
| Vasopressin-regulated water reabsorption | 7  | C=44;O=7;E=1.74;R=4.03;rawP=0.0016;adjP=0.0104   |
| Long-term potentiation                   | 9  | C=70;O=9;E=2.76;R=3.26;rawP=0.0017;adjP=0.0104   |
| Bile secretion                           | 9  | C=71;O=9;E=2.80;R=3.21;rawP=0.0019;adjP=0.0109   |
| Melanoma                                 | 9  | C=71;O=9;E=2.80;R=3.21;rawP=0.0019;adjP=0.0109   |
| Purine metabolism                        | 15 | C=162;O=15;E=6.40;R=2.34;rawP=0.0020;adjP=0.0111 |
| Notch signaling pathway                  | 7  | C=47;O=7;E=1.86;R=3.77;rawP=0.0023;adjP=0.0124   |
| Prostate cancer                          | 10 | C=89;O=10;E=3.51;R=2.85;rawP=0.0027;adjP=0.0141  |
| Gap junction                             | 10 | C=90;O=10;E=3.55;R=2.81;rawP=0.0029;adjP=0.0147  |
| Endometrial cancer                       | 7  | C=52;O=7;E=2.05;R=3.41;rawP=0.0042;adjP=0.0195   |
| Glioma                                   | 8  | C=65;O=8;E=2.57;R=3.12;rawP=0.0040;adjP=0.0195   |
| mTOR signaling pathway                   | 7  | C=52;O=7;E=2.05;R=3.41;rawP=0.0042;adjP=0.0195   |
| One carbon pool by folate                | 4  | C=18;O=4;E=0.71;R=5.63;rawP=0.0048;adjP=0.0217   |
| RNA polymerase                           | 5  | C=29;O=5;E=1.15;R=4.37;rawP=0.0051;adjP=0.0225   |
| Adipocytokine                            | 8  | C=68;O=8;E=2.69;R=2.98;rawP=0.0053               |

|                                                       |    |                                                    |
|-------------------------------------------------------|----|----------------------------------------------------|
| signaling pathway                                     |    | ;adjP=0.0228                                       |
| Bacterial invasion of epithelial cells                | 8  | C=70;O=8;E=2.76;R=2.89;rawP=0.0063<br>;adjP=0.0264 |
| Melanogenesis                                         | 10 | C=101;O=10;E=3.99;R=2.51;rawP=0.0067;adjP=0.0274   |
| ABC transporters                                      | 6  | C=44;O=6;E=1.74;R=3.45;rawP=0.0073<br>;adjP=0.0277 |
| Inositol phosphate metabolism                         | 7  | C=57;O=7;E=2.25;R=3.11;rawP=0.0070<br>;adjP=0.0277 |
| Ubiquitin mediated proteolysis                        | 12 | C=135;O=12;E=5.33;R=2.25;rawP=0.0074;adjP=0.0277   |
| Leishmaniasis                                         | 8  | C=72;O=8;E=2.84;R=2.81;rawP=0.0074<br>;adjP=0.0277 |
| Gastric acid secretion                                | 8  | C=74;O=8;E=2.92;R=2.74;rawP=0.0087<br>;adjP=0.0318 |
| Amoebiasis                                            | 10 | C=106;O=10;E=4.19;R=2.39;rawP=0.0093;adjP=0.0333   |
| Antigen processing and presentation                   | 8  | C=76;O=8;E=3.00;R=2.67;rawP=0.0102<br>;adjP=0.0358 |
| Ribosome                                              | 9  | C=92;O=9;E=3.63;R=2.48;rawP=0.0105<br>;adjP=0.0361 |
| Intestinal immune network for IgA production          | 6  | C=48;O=6;E=1.90;R=3.17;rawP=0.0112<br>;adjP=0.0363 |
| Calcium signaling pathway                             | 14 | C=177;O=14;E=6.99;R=2.00;rawP=0.0109;adjP=0.0363   |
| Type II diabetes mellitus                             | 6  | C=48;O=6;E=1.90;R=3.17;rawP=0.0112<br>;adjP=0.0363 |
| Spliceosome                                           | 11 | C=127;O=11;E=5.01;R=2.19;rawP=0.0121;adjP=0.0385   |
| Glycerophospholipid metabolism                        | 8  | C=80;O=8;E=3.16;R=2.53;rawP=0.0136<br>;adjP=0.0425 |
| Butirosin and neomycin biosynthesis                   | 2  | C=5;O=2;E=0.20;R=10.13;rawP=0.0144<br>;adjP=0.0442 |
| Malaria                                               | 6  | C=51;O=6;E=2.01;R=2.98;rawP=0.0148<br>;adjP=0.0447 |
| Glycosylphosphatidylinositol(GPI)-anchor biosynthesis | 4  | C=25;O=4;E=0.99;R=4.05;rawP=0.0158<br>;adjP=0.0469 |
| Autoimmune thyroid disease                            | 6  | C=52;O=6;E=2.05;R=2.92;rawP=0.0162<br>;adjP=0.0472 |
