# Supplementary material for: An Investigation about Gene Modules Associated with hDPSC Differentiation for Adolescents
Source: Hindawi journal article supplement (doi:10.1155/2019/8913287), 2019-04-04
Supplement: f1 [file 8913287.f1.zip]

**S3 Table. There were 660 genes up-regulated at P10 in the yellow module.**

| <b>Gene Symbol</b> | <b>Gene Name</b>                                                       | <b>Entrez Gene</b> |
|--------------------|------------------------------------------------------------------------|--------------------|
| ADA                | adenosine deaminase                                                    | 100                |
| LINC00476          | long intergenic non-protein coding RNA 476                             | 100128782          |
| SLC25A21-AS1       | SLC25A21 antisense RNA 1                                               | 100129794          |
| HDAC6              | histone deacetylase 6                                                  | 10013              |
| CKMT2-AS1          | CKMT2 antisense RNA 1                                                  | 100131067          |
| TSTD1              | thiosulfate sulfurtransferase like domain containing 1                 | 100131187          |
| MSC-AS1            | MSC antisense RNA 1                                                    | 100132891          |
| BCL2L11            | BCL2 like 11                                                           | 10018              |
| EML2-AS1           | EML2 antisense RNA 1                                                   | 100287177          |
| SMKR1              | small lysine rich protein 1                                            | 100287482          |
| SLIT1-AS1          | SLIT1 antisense RNA 1                                                  | 100505540          |
| LOC100505609       | long intergenic non-protein coding RNA 2053                            | 100505609          |
| LINC01133          | long intergenic non-protein coding RNA 1133                            | 100505633          |
| NAPA-AS1           | NAPA antisense RNA 1                                                   | 100505681          |
| RPARP-AS1          | RPARP antisense RNA 1                                                  | 100505761          |
| APTR               | Alu-mediated CDKN1A/p21 transcriptional regulator (non-protein coding) | 100505854          |
| PTOV1-AS1          | PTOV1 antisense RNA 1                                                  | 100506033          |
| LOC100506082       | uncharacterized LOC100506082                                           | 100506082          |
| LINC01503          | long intergenic non-protein coding RNA 1503                            | 100506119          |
| LINC00867          | long intergenic non-protein coding RNA 867                             | 100506126          |
| LARGE-AS1          | LARGE antisense RNA 1                                                  | 100506195          |
| LOC100506274       | uncharacterized LOC100506274                                           | 100506274          |
| LOC100506302       | uncharacterized LOC100506302                                           | 100506302          |
| LOC100506498       | uncharacterized LOC100506498                                           | 100506498          |
| NRAV               | negative regulator of antiviral response (non-protein coding)          | 100506668          |
| ZNF865             | zinc finger protein 865                                                | 100507290          |
| LOC100507557       | uncharacterized LOC100507557                                           | 100507557          |

|                |                                                      |           |
|----------------|------------------------------------------------------|-----------|
| LOC100508631   | uncharacterized LOC100508631                         | 100508631 |
| TSPAN32        | tetraspanin 32                                       | 10077     |
| TMEM265        | transmembrane protein 265                            | 100862671 |
| LOC100996419   | uncharacterized LOC100996419                         | 100996419 |
| TSPAN2         | tetraspanin 2                                        | 10100     |
| LOC101927480   | uncharacterized LOC101927480                         | 101927480 |
| ZNF529-AS1     | ZNF529 antisense RNA 1                               | 101927599 |
| C5orf66-AS1    | C5orf66 antisense RNA 1                              | 101927953 |
| LOC101928009   | uncharacterized LOC101928009                         | 101928009 |
| TCONS_00029157 | long intergenic non-protein coding RNA 1679          | 101928399 |
| ZNF649-AS1     | ZNF649 antisense RNA 1                               | 101928571 |
| LIPC-AS1       | LIPC antisense RNA 1                                 | 101928694 |
| LOC101928728   | uncharacterized LOC101928728                         | 101928728 |
| LOC101929528   | uncharacterized LOC101929528                         | 101929528 |
| LOC101929607   | long intergenic non-protein coding RNA 1990          | 101929607 |
| NBR2           | neighbor of BRCA1 gene 2 (non-protein coding)        | 10230     |
| RTN3           | reticulon 3                                          | 10313     |
| PCGF3          | polycomb group ring finger 3                         | 10336     |
| EIF3M          | eukaryotic translation initiation factor 3 subunit M | 10480     |
| NEBL           | nebulette                                            | 10529     |
| CDC42EP3       | CDC42 effector protein 3                             | 10602     |
| RBCK1          | RANBP2-type and C3HC4-type zinc finger containing 1  | 10616     |
| TXNIP          | thioredoxin interacting protein                      | 10628     |
| CNPY3          | canopy FGF signaling regulator 3                     | 10695     |
| TRAF3IP2       | TRAF3 interacting protein 2                          | 10758     |
| ARPP21         | cAMP regulated phosphoprotein 21                     | 10777     |
| ZNF268         | zinc finger protein 268                              | 10795     |
| CFTR           | cystic fibrosis transmembrane conductance regulator  | 1080      |
| TCERG1         | transcription elongation regulator 1                 | 10915     |
| SRSF8          | serine and arginine rich splicing factor 8           | 10929     |
| METAP2         | methionyl aminopeptidase 2                           | 10988     |
| SLC27A3        | solute carrier family 27 member 3                    | 11000     |
| DUS4L          | dihydrouridine synthase 4 like                       | 11062     |

|          |                                                                              |        |
|----------|------------------------------------------------------------------------------|--------|
| C10orf10 | chromosome 10 open reading frame 10                                          | 11067  |
| DIDO1    | death inducer-obliterator 1                                                  | 11083  |
| NUDT4    | nudix hydrolase 4                                                            | 11163  |
| ABCB8    | ATP binding cassette subfamily B member 8                                    | 11194  |
| IFT43    | intraflagellar transport 43                                                  | 112752 |
| MFSD3    | major facilitator superfamily domain containing 3                            | 113655 |
| SDSL     | serine dehydratase like                                                      | 113675 |
| KLHDC7B  | kelch domain containing 7B                                                   | 113730 |
| ZBED6CL  | ZBED6 C-terminal like                                                        | 113763 |
| MBD6     | methyl-CpG binding domain protein 6                                          | 114785 |
| SLITRK1  | SLIT and NTRK like family member 1                                           | 114798 |
| PCMTD1   | protein-L-isoaspartate (D-aspartate) O-methyltransferase domain containing 1 | 115294 |
| GPR146   | G protein-coupled receptor 146                                               | 115330 |
| CYYR1    | cysteine and tyrosine rich 1                                                 | 116159 |
| RBP7     | retinol binding protein 7                                                    | 116362 |
| ZNF837   | zinc finger protein 837                                                      | 116412 |
| RAB39B   | RAB39B, member RAS oncogene family                                           | 116442 |
| TOP1MT   | topoisomerase (DNA) I, mitochondrial                                         | 116447 |
| SH2D1B   | SH2 domain containing 1B                                                     | 117157 |
| PRAP1    | proline rich acidic protein 1                                                | 118471 |
| COMTD1   | catechol-O-methyltransferase domain containing 1                             | 118881 |
| ADD2     | adducin 2                                                                    | 119    |
| GSTO2    | glutathione S-transferase omega 2                                            | 119391 |
| ANAPC16  | anaphase promoting complex subunit 16                                        | 119504 |
| SFXN4    | sideroflexin 4                                                               | 119559 |
| FAT3     | FAT atypical cadherin 3                                                      | 120114 |
| TMEM45B  | transmembrane protein 45B                                                    | 120224 |
| CYP2R1   | cytochrome P450 family 2 subfamily R member 1                                | 120227 |
| RHEBL1   | Ras homolog enriched in brain like 1                                         | 121268 |
| C14orf28 | chromosome 14 open reading frame                                             | 122525 |

|          |                                                              |        |
|----------|--------------------------------------------------------------|--------|
|          | 28                                                           |        |
| ACOT4    | acyl-CoA thioesterase 4                                      | 122970 |
| MSI2     | musashi RNA binding protein 2                                | 124540 |
| ZNF440   | zinc finger protein 440                                      | 126070 |
| SHE      | Src homology 2 domain containing E                           | 126669 |
| CCSAP    | centriole, cilia and spindle associated protein              | 126731 |
| ERICH3   | glutamate rich 3                                             | 127254 |
| ZNF684   | zinc finger protein 684                                      | 127396 |
| C1orf131 | chromosome 1 open reading frame 131                          | 128061 |
| SPATA17  | spermatogenesis associated 17                                | 128153 |
| DRAM2    | DNA damage regulated autophagy modulator 2                   | 128338 |
| COL4A2   | collagen type IV alpha 2 chain                               | 1284   |
| SIRPD    | signal regulatory protein delta                              | 128646 |
| COL5A1   | collagen type V alpha 1 chain                                | 1289   |
| LYG1     | lysozyme g1                                                  | 129530 |
| COL8A2   | collagen type VIII alpha 2 chain                             | 1296   |
| COL11A2  | collagen type XI alpha 2 chain                               | 1302   |
| PLEKHH2  | pleckstrin homology, MyTH4 and FERM domain containing H2     | 130271 |
| LYPD6    | LY6/PLAUR domain containing 6                                | 130574 |
| GALM     | galactose mutarotase                                         | 130589 |
| TMEM182  | transmembrane protein 182                                    | 130827 |
| NADK2    | NAD kinase 2, mitochondrial                                  | 133686 |
| JMY      | junction mediating and regulatory protein, p53 cofactor      | 133746 |
| TMEM171  | transmembrane protein 171                                    | 134285 |
| IRAK1BP1 | interleukin 1 receptor associated kinase 1 binding protein 1 | 134728 |
| DPCR1    | diffuse panbronchiolitis critical region 1                   | 135656 |
| NDUFAF6  | NADH:ubiquinone oxidoreductase complex assembly factor 6     | 137682 |
| C9orf116 | chromosome 9 open reading frame 116                          | 138162 |
| FAM69B   | family with sequence similarity 69 member B                  | 138311 |
| PTPDC1   | protein tyrosine phosphatase domain containing 1             | 138639 |

|           |                                                              |        |
|-----------|--------------------------------------------------------------|--------|
| RPP25L    | ribonuclease P/MRP subunit p25 like                          | 138716 |
| TRIM69    | tripartite motif containing 69                               | 140691 |
| UBE2F     | ubiquitin conjugating enzyme E2 F (putative)                 | 140739 |
| SMCR8     | Smith-Magenis syndrome chromosome region, candidate 8        | 140775 |
| RPL10L    | ribosomal protein L10 like                                   | 140801 |
| NEURL2    | neuralized E3 ubiquitin protein ligase 2                     | 140825 |
| R3HDML    | R3H domain containing like                                   | 140902 |
| PLEKHA7   | pleckstrin homology domain containing A7                     | 144100 |
| PRICKLE1  | prickle planar cell polarity protein 1                       | 144165 |
| ALG10B    | ALG10B, alpha-1,2-glucosyltransferase                        | 144245 |
| ZNF664    | zinc finger protein 664                                      | 144348 |
| GLT1D1    | glycosyltransferase 1 domain containing 1                    | 144423 |
| LACC1     | laccase domain containing 1                                  | 144811 |
| MIPOL1    | mirror-image polydactyly 1                                   | 145282 |
| PPP1R36   | protein phosphatase 1 regulatory subunit 36                  | 145376 |
| LOC145694 | uncharacterized LOC145694                                    | 145694 |
| C2CD4A    | C2 calcium dependent domain containing 4A                    | 145741 |
| C15orf65  | chromosome 15 open reading frame 65                          | 145788 |
| TTBK2     | tau tubulin kinase 2                                         | 146057 |
| CMTM4     | CKLF like MARVEL transmembrane domain containing 4           | 146223 |
| RNF151    | ring finger protein 151                                      | 146310 |
| ZNF784    | zinc finger protein 784                                      | 147808 |
| CDC42EP5  | CDC42 effector protein 5                                     | 148170 |
| ZNF555    | zinc finger protein 555                                      | 148254 |
| MANEAL    | mannosidase endo-alpha like                                  | 149175 |
| RNF187    | ring finger protein 187                                      | 149603 |
| TTC30B    | tetratricopeptide repeat domain 30B                          | 150737 |
| ZNF385B   | zinc finger protein 385B                                     | 151126 |
| METTL21A  | methyltransferase like 21A                                   | 151194 |
| WDSUB1    | WD repeat, sterile alpha motif and U-box domain containing 1 | 151525 |

|             |                                                |        |
|-------------|------------------------------------------------|--------|
| CCDC80      | coiled-coil domain containing 80               | 151887 |
| FGD5        | FYVE, RhoGEF and PH domain containing 5        | 152273 |
| CXADR       | coxsackie virus and adenovirus receptor        | 1525   |
| JAKMIP2-AS1 | JAKMIP2 antisense RNA 1                        | 153469 |
| IRX2        | iroquois homeobox 2                            | 153572 |
| TTC23L      | tetratricopeptide repeat domain 23 like        | 153657 |
| RNF217      | ring finger protein 217                        | 154214 |
| CLEC2L      | C-type lectin domain family 2 member L         | 154790 |
| VPS37D      | VPS37D, ESCRT-I subunit                        | 155382 |
| FBXO16      | F-box protein 16                               | 157574 |
| SLC7A13     | solute carrier family 7 member 13              | 157724 |
| MCMDC2      | minichromosome maintenance domain containing 2 | 157777 |
| AK8         | adenylate kinase 8                             | 158067 |
| KIAA1958    | KIAA1958                                       | 158405 |
| DYX1C1      | dyslexia susceptibility 1 candidate 1          | 161582 |
| SLFN5       | schlafen family member 5                       | 162394 |
| ZNF780B     | zinc finger protein 780B                       | 163131 |
| ACE         | angiotensin I converting enzyme                | 1636   |
| DCT         | dopachrome tautomerase                         | 1638   |
| FREM3       | FRAS1 related extracellular matrix 3           | 166752 |
| SYNPO2      | synaptopodin 2                                 | 171024 |
| CLYBL       | citrate lyase beta like                        | 171425 |
| DIAPH2      | diaphanous related formin 2                    | 1730   |
| AGA         | aspartylglucosaminidase                        | 175    |
| DNASE2      | deoxyribonuclease 2, lysosomal                 | 1777   |
| DTNA        | dystrobrevin alpha                             | 1837   |
| DUSP3       | dual specificity phosphatase 3                 | 1845   |
| CYS1        | cystin 1                                       | 192668 |
| AGO3        | argonaute 3, RISC catalytic component          | 192669 |
| DNAH10      | dynein axonemal heavy chain 10                 | 196385 |
| U2AF1L4     | U2 small nuclear RNA auxiliary factor 1 like 4 | 199746 |
| ZNF626      | zinc finger protein 626                        | 199777 |
| TMEM201     | transmembrane protein 201                      | 199953 |

|         |                                                              |        |
|---------|--------------------------------------------------------------|--------|
| CC2D1B  | coiled-coil and C2 domain containing 1B                      | 200014 |
| TMEM17  | transmembrane protein 17                                     | 200728 |
| ARL13B  | ADP ribosylation factor like GTPase 13B                      | 200894 |
| LYRM9   | LYR motif containing 9                                       | 201229 |
| TMEM192 | transmembrane protein 192                                    | 201931 |
| STK32A  | serine/threonine kinase 32A                                  | 202374 |
| CCDC171 | coiled-coil domain containing 171                            | 203238 |
| SUSD3   | sushi domain containing 3                                    | 203328 |
| EPHA1   | EPH receptor A1                                              | 2041   |
| EPHB1   | EPH receptor B1                                              | 2047   |
| SLC44A5 | solute carrier family 44 member 5                            | 204962 |
| ERN1    | endoplasmic reticulum to nucleus signaling 1                 | 2081   |
| UNC5B   | unc-5 netrin receptor B                                      | 219699 |
| TYSND1  | trypsin domain containing 1                                  | 219743 |
| TMEM218 | transmembrane protein 218                                    | 219854 |
| CFAP53  | cilia and flagella associated protein 53                     | 220136 |
| 8-Mar   | membrane associated ring-CH-type finger 8                    | 220972 |
| LRRN4CL | LRRN4 C-terminal like                                        | 221091 |
| AK9     | adenylate kinase 9                                           | 221264 |
| KIF6    | kinesin family member 6                                      | 221458 |
| JAZF1   | JAZF zinc finger 1                                           | 221895 |
| MTURN   | maturin, neural progenitor differentiation regulator homolog | 222166 |
| FAM185A | family with sequence similarity 185 member A                 | 222234 |
| ATXN7L1 | ataxin 7 like 1                                              | 222255 |
| BEND7   | BEN domain containing 7                                      | 222389 |
| FAM83B  | family with sequence similarity 83 member B                  | 222584 |
| ZNRF2   | zinc and ring finger 2                                       | 223082 |
| FHL1    | four and a half LIM domains 1                                | 2273   |
| ITGA11  | integrin subunit alpha 11                                    | 22801  |
| AAK1    | AP2 associated kinase 1                                      | 22848  |
| CPEB3   | cytoplasmic polyadenylation element binding protein 3        | 22849  |
| MLXIP   | MLX interacting protein                                      | 22877  |

|          |                                                     |        |
|----------|-----------------------------------------------------|--------|
| ANKRD6   | ankyrin repeat domain 6                             | 22881  |
| DAAM1    | dishevelled associated activator of morphogenesis 1 | 23002  |
| PEG10    | paternally expressed 10                             | 23089  |
| ZNF423   | zinc finger protein 423                             | 23090  |
| CLASP2   | cytoplasmic linker associated protein 2             | 23122  |
| KDM6B    | lysine demethylase 6B                               | 23135  |
| CEP68    | centrosomal protein 68                              | 23177  |
| PASK     | PAS domain containing serine/threonine kinase       | 23178  |
| MESDC2   | mesoderm development candidate 2                    | 23184  |
| ACSBG1   | acyl-CoA synthetase bubblegum family member 1       | 23205  |
| RHOBTB2  | Rho related BTB domain containing 2                 | 23221  |
| NUP210   | nucleoporin 210                                     | 23225  |
| EXOC6B   | exocyst complex component 6B                        | 23233  |
| CAMTA1   | calmodulin binding transcription activator 1        | 23261  |
| CLASP1   | cytoplasmic linker associated protein 1             | 23332  |
| DOCK9    | dedicator of cytokinesis 9                          | 23348  |
| KIAA0895 | KIAA0895                                            | 23366  |
| MED13L   | mediator complex subunit 13 like                    | 23389  |
| ZDHHC17  | zinc finger DHHC-type containing 17                 | 23390  |
| ABCA5    | ATP binding cassette subfamily A member 5           | 23461  |
| NPTXR    | neuronal pentraxin receptor                         | 23467  |
| ZFYVE26  | zinc finger FYVE-type containing 26                 | 23503  |
| TTC9     | tetratricopeptide repeat domain 9                   | 23508  |
| SEZ6L    | seizure related 6 homolog like                      | 23544  |
| ATP6V0A2 | ATPase H <sup>+</sup> transporting V0 subunit a2    | 23545  |
| PSD4     | pleckstrin and Sec7 domain containing 4             | 23550  |
| CLDN15   | claudin 15                                          | 24146  |
| ZNF396   | zinc finger protein 396                             | 252884 |
| STXBP4   | syntaxin binding protein 4                          | 252983 |
| TCP11L2  | t-complex 11 like 2                                 | 255394 |
| FAM19A5  | family with sequence similarity 19                  | 25817  |



|            |                                                                                                |        |
|------------|------------------------------------------------------------------------------------------------|--------|
|            | member A5, C-C motif chemokine like                                                            |        |
| BACE2      | beta-site APP-cleaving enzyme 2                                                                | 25825  |
| PAMR1      | peptidase domain containing<br>associated with muscle regeneration<br>1                        | 25891  |
| ALS2CL     | ALS2 C-terminal like                                                                           | 259173 |
| TMIE       | transmembrane inner ear                                                                        | 259236 |
| SIN3A      | SIN3 transcription regulator family<br>member A                                                | 25942  |
| ADGRA2     | adhesion G protein-coupled receptor<br>A2                                                      | 25960  |
| GGA1       | golgi associated, gamma adaptin ear<br>containing, ARF binding protein 1                       | 26088  |
| ZNF658     | zinc finger protein 658                                                                        | 26149  |
| RSL1D1     | ribosomal L1 domain containing 1                                                               | 26156  |
| GIMAP2     | GTPase, IMAP family member 2                                                                   | 26157  |
| LRRC29     | leucine rich repeat containing 29                                                              | 26231  |
| FBXL4      | F-box and leucine rich repeat protein<br>4                                                     | 26235  |
| FBXO25     | F-box protein 25                                                                               | 26260  |
| SERGEF     | secretion regulating guanine<br>nucleotide exchange factor                                     | 26297  |
| NR6A1      | nuclear receptor subfamily 6 group A<br>member 1                                               | 2649   |
| GGCX       | gamma-glutamyl carboxylase                                                                     | 2677   |
| ST6GALNAC4 | ST6 N-acetylgalactosaminide<br>alpha-2,6-sialyltransferase 4                                   | 27090  |
| ATP5S      | ATP synthase, H <sup>+</sup> transporting,<br>mitochondrial Fo complex subunit s<br>(factor B) | 27109  |
| SNX5       | sorting nexin 5                                                                                | 27131  |
| PCDH17     | protocadherin 17                                                                               | 27253  |
| LSM3       | LSM3 homolog, U6 small nuclear RNA<br>and mRNA degradation associated                          | 27258  |
| GPC1       | glypican 1                                                                                     | 2817   |
| GPLD1      | glycosylphosphatidylinositol specific<br>phospholipase D1                                      | 2822   |
| GPR1       | G protein-coupled receptor 1                                                                   | 2825   |
| ZNF311     | zinc finger protein 311                                                                        | 282890 |
| SBF2-AS1   | SBF2 antisense RNA 1                                                                           | 283104 |
| LOC283140  | uncharacterized LOC283140                                                                      | 283140 |

|             |                                                         |        |
|-------------|---------------------------------------------------------|--------|
| PGM2L1      | phosphoglucumutase 2 like 1                             | 283209 |
| HARBI1      | harbinger transposase derived 1                         | 283254 |
| ADGRD1      | adhesion G protein-coupled receptor D1                  | 283383 |
| FGF14-AS2   | FGF14 antisense RNA 2                                   | 283481 |
| LINC01146   | long intergenic non-protein coding RNA 1146             | 283587 |
| PRTG        | protogenin                                              | 283659 |
| LINC01270   | long intergenic non-protein coding RNA 1270             | 284751 |
| GPR27       | G protein-coupled receptor 27                           | 2850   |
| CDH19       | cadherin 19                                             | 28513  |
| C3orf33     | chromosome 3 open reading frame 33                      | 285315 |
| TCAIM       | T-cell activation inhibitor, mitochondrial              | 285343 |
| LOC285593   | uncharacterized LOC285593                               | 285593 |
| KIAA0825    | KIAA0825                                                | 285600 |
| RNF180      | ring finger protein 180                                 | 285671 |
| PPIL6       | peptidylprolyl isomerase like 6                         | 285755 |
| LY86-AS1    | LY86 antisense RNA 1                                    | 285780 |
| LINC00174   | long intergenic non-protein coding RNA 174              | 285908 |
| WEE2-AS1    | WEE2 antisense RNA 1                                    | 285962 |
| SLC26A4-AS1 | SLC26A4 antisense RNA 1                                 | 286002 |
| FAM86B3P    | family with sequence similarity 86, member A pseudogene | 286042 |
| FAM83H      | family with sequence similarity 83 member H             | 286077 |
| ANK2        | ankyrin 2                                               | 287    |
| C11orf54    | chromosome 11 open reading frame 54                     | 28970  |
| GRIK5       | glutamate ionotropic receptor kainate type subunit 5    | 2901   |
| ZBTB44      | zinc finger and BTB domain containing 44                | 29068  |
| CCDC113     | coiled-coil domain containing 113                       | 29070  |
| ARHGAP35    | Rho GTPase activating protein 35                        | 2909   |
| DMGDH       | dimethylglycine dehydrogenase                           | 29958  |
| KCNIP3      | potassium voltage-gated channel interacting protein 3   | 30818  |

|          |                                                             |        |
|----------|-------------------------------------------------------------|--------|
| EHD4     | EH domain containing 4                                      | 30844  |
| HLA-DQA1 | major histocompatibility complex, class II, DQ alpha 1      | 3117   |
| EIF4E3   | eukaryotic translation initiation factor 4E family member 3 | 317649 |
| ACACB    | acetyl-CoA carboxylase beta                                 | 32     |
| HOXA11   | homeobox A11                                                | 3207   |
| HOXB7    | homeobox B7                                                 | 3217   |
| APBB2    | amyloid beta precursor protein binding family B member 2    | 323    |
| HSPA9    | heat shock protein family A (Hsp70) member 9                | 3313   |
| ICAM2    | intercellular adhesion molecule 2                           | 3384   |
| C1orf228 | chromosome 1 open reading frame 228                         | 339541 |
| BEX5     | brain expressed X-linked 5                                  | 340542 |
| NANOS1   | nanos C2HC-type zinc finger 1                               | 340719 |
| SLC35F4  | solute carrier family 35 member F4                          | 341880 |
| ZNF677   | zinc finger protein 677                                     | 342926 |
| IFIT2    | interferon induced protein with tetratricopeptide repeats 2 | 3433   |
| PAQR9    | progesterone and adipoQ receptor family member 9            | 344838 |
| RSPH4A   | radial spoke head 4 homolog A                               | 345895 |
| TUBB2B   | tubulin beta 2B class IIb                                   | 347733 |
| ZNF713   | zinc finger protein 713                                     | 349075 |
| NMNAT3   | nicotinamide nucleotide adenylyltransferase 3               | 349565 |
| IL6R     | interleukin 6 receptor                                      | 3570   |
| RFLNB    | refilin B                                                   | 359845 |
| IL15     | interleukin 15                                              | 3600   |
| INSR     | insulin receptor                                            | 3643   |
| ITGAD    | integrin subunit alpha D                                    | 3681   |
| JARID2   | jumonji and AT-rich interaction domain containing 2         | 3720   |
| EFCAB5   | EF-hand calcium binding domain 5                            | 374786 |
| ANKRD30B | ankyrin repeat domain 30B                                   | 374860 |
| ATP9B    | ATPase phospholipid transporting 9B (putative)              | 374868 |
| TMEM205  | transmembrane protein 205                                   | 374882 |

|            |                                                              |        |
|------------|--------------------------------------------------------------|--------|
| YJEFN3     | YjeF N-terminal domain containing 3                          | 374887 |
| SPATA21    | spermatogenesis associated 21                                | 374955 |
| AGRN       | agrin                                                        | 375790 |
| SLC27A1    | solute carrier family 27 member 1                            | 376497 |
| ZNF582-AS1 | ZNF582 antisense RNA 1 (head to head)                        | 386758 |
| GUSBP2     | glucuronidase, beta pseudogene 2                             | 387036 |
| SLC22A25   | solute carrier family 22 member 25                           | 387601 |
| TMEM220    | transmembrane protein 220                                    | 388335 |
| SMIM1      | small integral membrane protein 1 (Vel blood group)          | 388588 |
| LINC01118  | long intergenic non-protein coding RNA 1118                  | 388948 |
| KRT86      | keratin 86                                                   | 3892   |
| LIG4       | DNA ligase 4                                                 | 3981   |
| FADS3      | fatty acid desaturase 3                                      | 3995   |
| MEX3D      | mex-3 RNA binding family member D                            | 399664 |
| CASC10     | cancer susceptibility 10                                     | 399726 |
| FLJ37035   | uncharacterized LOC399821                                    | 399821 |
| FAM174B    | family with sequence similarity 174 member B                 | 400451 |
| FLJ22763   | uncharacterized LOC401081                                    | 401081 |
| OR2A20P    | olfactory receptor family 2 subfamily A member 20 pseudogene | 401428 |
| WDFY3-AS2  | WDFY3 antisense RNA 2                                        | 404201 |
| MIR143     | microRNA 143                                                 | 406935 |
| SMAD2      | SMAD family member 2                                         | 4087   |
| LCN10      | lipocalin 10                                                 | 414332 |
| MCF2       | MCF.2 cell line derived transforming sequence                | 4168   |
| MDM2       | MDM2 proto-oncogene                                          | 4193   |
| MIA2       | melanoma inhibitory activity 2                               | 4253   |
| MITF       | melanogenesis associated transcription factor                | 4286   |
| ATXN3      | ataxin 3                                                     | 4287   |
| MOCS1      | molybdenum cofactor synthesis 1                              | 4337   |
| MRE11      | MRE11 homolog, double strand break repair nuclease           | 4361   |
| UBL7-AS1   | UBL7 antisense RNA 1 (head to head)                          | 440288 |
| LOC440934  | uncharacterized LOC440934                                    | 440934 |

|              |                                                                   |        |
|--------------|-------------------------------------------------------------------|--------|
| MTHFD2L      | methylenetetrahydrofolate dehydrogenase (NADP+ dependent) 2-like  | 441024 |
| ZFAS1        | ZNFX1 antisense RNA 1                                             | 441951 |
| MTCP1        | mature T-cell proliferation 1                                     | 4515   |
| NCAM1        | neural cell adhesion molecule 1                                   | 4684   |
| NDUFA10      | NADH:ubiquinone oxidoreductase subunit A10                        | 4705   |
| NEDD9        | neural precursor cell expressed, developmentally down-regulated 9 | 4739   |
| NFE2L1       | nuclear factor, erythroid 2 like 1                                | 4779   |
| NHS          | NHS actin remodeling regulator                                    | 4810   |
| NPAS2        | neuronal PAS domain protein 2                                     | 4862   |
| NTRK3        | neurotrophic receptor tyrosine kinase 3                           | 4916   |
| ROR1         | receptor tyrosine kinase like orphan receptor 1                   | 4919   |
| DFNB59       | deafness, autosomal recessive 59                                  | 494513 |
| OMD          | osteomodulin                                                      | 4958   |
| TIFAB        | TIFA inhibitor                                                    | 497189 |
| OSM          | oncostatin M                                                      | 5008   |
| PAH          | phenylalanine hydroxylase                                         | 5053   |
| PAM          | peptidylglycine alpha-amidating monooxygenase                     | 5066   |
| PAWR         | pro-apoptotic WT1 regulator                                       | 5074   |
| TMED5        | transmembrane p24 trafficking protein 5                           | 50999  |
| AMDHD2       | amidohydrolase domain containing 2                                | 51005  |
| SEPSECS      | Sep (O-phosphoserine) tRNA:Sec (selenocysteine) tRNA synthase     | 51091  |
| ING4         | inhibitor of growth family member 4                               | 51147  |
| CERCAM       | cerebral endothelial cell adhesion molecule                       | 51148  |
| MAPKAPK5-AS1 | MAPKAPK5 antisense RNA 1                                          | 51275  |
| ZNF117       | zinc finger protein 117                                           | 51351  |
| PDE1A        | phosphodiesterase 1A                                              | 5136   |
| TEX264       | testis expressed 264                                              | 51368  |
| CXXC5        | CXXC finger protein 5                                             | 51523  |
| HDAC7        | histone deacetylase 7                                             | 51564  |
| DPH5         | diphthamide biosynthesis 5                                        | 51611  |

|         |                                                        |       |
|---------|--------------------------------------------------------|-------|
| ERGIC3  | ERGIC and golgi 3                                      | 51614 |
| STYXL1  | serine/threonine/tyrosine interacting like 1           | 51657 |
| PECAM1  | platelet and endothelial cell adhesion molecule 1      | 5175  |
| ABCB1   | ATP binding cassette subfamily B member 1              | 5243  |
| PIP4K2A | phosphatidylinositol-5-phosphate 4-kinase type 2 alpha | 5305  |
| BCL11A  | B-cell CLL/lymphoma 11A                                | 53335 |
| PLXNB1  | plexin B1                                              | 5364  |
| PMS1    | PMS1 homolog 1, mismatch repair system component       | 5378  |
| GPR85   | G protein-coupled receptor 85                          | 54329 |
| FAM134B | family with sequence similarity 134 member B           | 54463 |
| RNF216  | ring finger protein 216                                | 54476 |
| PLEKHA5 | pleckstrin homology domain containing A5               | 54477 |
| MIER2   | MIER family member 2                                   | 54531 |
| MRPL50  | mitochondrial ribosomal protein L50                    | 54534 |
| NECAB2  | N-terminal EF-hand calcium binding protein 2           | 54550 |
| SPATA6  | spermatogenesis associated 6                           | 54558 |
| GNB1L   | G protein subunit beta 1 like                          | 54584 |
| LZTFL1  | leucine zipper transcription factor like 1             | 54585 |
| EQTN    | equatorin                                              | 54586 |
| ZNF853  | zinc finger protein 853                                | 54753 |
| KLHL24  | kelch like family member 24                            | 54800 |
| GIN1    | gypsy retrotransposon integrase 1                      | 54826 |
| PGPEP1  | pyroglutamyl-peptidase I                               | 54858 |
| FNBP1L  | formin binding protein 1 like                          | 54874 |
| WHSC1L1 | nuclear receptor binding SET domain protein 3          | 54904 |
| EXD3    | exonuclease 3'-5' domain containing 3                  | 54932 |
| RNF125  | ring finger protein 125                                | 54941 |
| ULK4    | unc-51 like kinase 4                                   | 54986 |
| KIF26B  | kinesin family member 26B                              | 55083 |
| ANO1    | anoctamin 1                                            | 55107 |

|           |                                                              |       |
|-----------|--------------------------------------------------------------|-------|
| RAVER2    | ribonucleoprotein, PTB binding 2                             | 55225 |
| QRSL1     | glutaminyl-tRNA synthase<br>(glutamine-hydrolyzing)-like 1   | 55278 |
| SYNJ2BP   | synaptojanin 2 binding protein                               | 55333 |
| NIPSNAP3B | nipsnap homolog 3B                                           | 55335 |
| YOD1      | YOD1 deubiquitinase                                          | 55432 |
| PRIM2     | primase (DNA) subunit 2                                      | 5558  |
| KIF27     | kinesin family member 27                                     | 55582 |
| PRKAB2    | protein kinase AMP-activated<br>non-catalytic subunit beta 2 | 5565  |
| SLC48A1   | solute carrier family 48 member 1                            | 55652 |
| BCAS4     | breast carcinoma amplified sequence<br>4                     | 55653 |
| 11-Sep    | septin 11                                                    | 55752 |
| TTC17     | tetratricopeptide repeat domain 17                           | 55761 |
| ZC4H2     | zinc finger C4H2-type containing                             | 55906 |
| BAIAP2L1  | BAI1 associated protein 2 like 1                             | 55971 |
| MYDGF     | myeloid derived growth factor                                | 56005 |
| PCDHGC4   | protocadherin gamma subfamily C, 4                           | 56098 |
| BEX4      | brain expressed X-linked 4                                   | 56271 |
| CCL28     | C-C motif chemokine ligand 28                                | 56477 |
| PSEN2     | presenilin 2                                                 | 5664  |
| B2M       | beta-2-microglobulin                                         | 567   |
| PSMA3     | proteasome subunit alpha 3                                   | 5684  |
| MEIS3     | Meis homeobox 3                                              | 56917 |
| LHX9      | LIM homeobox 9                                               | 56956 |
| C14orf132 | chromosome 14 open reading frame<br>132                      | 56967 |
| STOX2     | storkhead box 2                                              | 56977 |
| PRDM11    | PR/SET domain 11                                             | 56981 |
| ADAMTS9   | ADAM metallopeptidase with<br>thrombospondin type 1 motif 9  | 56999 |
| CABP4     | calcium binding protein 4                                    | 57010 |
| SLC17A7   | solute carrier family 17 member 7                            | 57030 |
| VANGL2    | VANGL planar cell polarity protein 2                         | 57216 |
| LYRM2     | LYR motif containing 2                                       | 57226 |
| PTGFRN    | prostaglandin F2 receptor inhibitor                          | 5738  |
| MIF4GD    | MIF4G domain containing                                      | 57409 |
| PPM1H     | protein phosphatase, Mg <sup>2+</sup> /Mn <sup>2+</sup>      | 57460 |

|          |                                                               |       |
|----------|---------------------------------------------------------------|-------|
|          | dependent 1H                                                  |       |
| ISY1     | ISY1 splicing factor homolog                                  | 57461 |
| NLGN4X   | neuroligin 4, X-linked                                        | 57502 |
| MTUS1    | microtubule associated tumor suppressor 1                     | 57509 |
| CGN      | cingulin                                                      | 57530 |
| KIAA1328 | KIAA1328                                                      | 57536 |
| SORCS2   | sortilin related VPS10 domain containing receptor 2           | 57537 |
| WDR35    | WD repeat domain 35                                           | 57539 |
| CCDC191  | coiled-coil domain containing 191                             | 57577 |
| KIAA1549 | KIAA1549                                                      | 57670 |
| ZNF250   | zinc finger protein 250                                       | 58500 |
| RALA     | RAS like proto-oncogene A                                     | 5898  |
| ENPP5    | ectonucleotide pyrophosphatase/phosphodiesterase 5 (putative) | 59084 |
| RXFP1    | relaxin/insulin like family peptide receptor 1                | 59350 |
| RBM4     | RNA binding motif protein 4                                   | 5936  |
| RFX3     | regulatory factor X3                                          | 5991  |
| RGS12    | regulator of G-protein signaling 12                           | 6002  |
| RHEB     | Ras homolog enriched in brain                                 | 6009  |
| GPBP1L1  | GC-rich promoter binding protein 1 like 1                     | 60313 |
| ELOVL5   | ELOVL fatty acid elongase 5                                   | 60481 |
| GAS5     | growth arrest specific 5 (non-protein coding)                 | 60674 |
| RPL37    | ribosomal protein L37                                         | 6167  |
| RPS27A   | ribosomal protein S27a                                        | 6233  |
| RPS29    | ribosomal protein S29                                         | 6235  |
| SAT1     | spermidine/spermine N1-acetyltransferase 1                    | 6303  |
| SBF1     | SET binding factor 1                                          | 6305  |
| SDC2     | syndecan 2                                                    | 6383  |
| ANKEF1   | ankyrin repeat and EF-hand domain containing 1                | 63926 |
| SEC14L1  | SEC14 like lipid binding 1                                    | 6397  |
| PRDM16   | PR/SET domain 16                                              | 63976 |
| SEMG2    | semenogelin II                                                | 6407  |



|           |                                                                 |        |
|-----------|-----------------------------------------------------------------|--------|
| EPB41L4A  | erythrocyte membrane protein band 4.1 like 4A                   | 64097  |
| C10orf54  | V-set immunoregulatory receptor                                 | 64115  |
| DNAJC1    | DnaJ heat shock protein family (Hsp40) member C1                | 64215  |
| SFRP2     | secreted frizzled related protein 2                             | 6423   |
| SFRP4     | secreted frizzled related protein 4                             | 6424   |
| CCT6P3    | chaperonin containing TCP1 subunit 6 pseudogene 3               | 643180 |
| AZI2      | 5-azacytidine induced 2                                         | 64343  |
| NOM1      | nucleolar protein with MIF4G domain 1                           | 64434  |
| LOC645166 | lymphocyte-specific protein 1 pseudogene                        | 645166 |
| GPR135    | G protein-coupled receptor 135                                  | 64582  |
| BNC1      | basonuclin 1                                                    | 646    |
| HRCT1     | histidine rich carboxyl terminus 1                              | 646962 |
| SHMT2     | serine hydroxymethyltransferase 2                               | 6472   |
| RMND5A    | required for meiotic nuclear division 5 homolog A               | 64795  |
| BCL11B    | B-cell CLL/lymphoma 11B                                         | 64919  |
| STAG3L4   | stromal antigen 3-like 4 (pseudogene)                           | 64940  |
| RAPH1     | Ras association (RalGDS/AF-6) and pleckstrin homology domains 1 | 65059  |
| WNK4      | WNK lysine deficient protein kinase 4                           | 65266  |
| SLC7A4    | solute carrier family 7 member 4                                | 6545   |
| SLC19A1   | solute carrier family 19 member 1                               | 6573   |
| KCTD14    | potassium channel tetramerization domain containing 14          | 65987  |
| SRPK2     | SRSF protein kinase 2                                           | 6733   |
| SSTR5     | somatostatin receptor 5                                         | 6755   |
| SUPV3L1   | Suv3 like RNA helicase                                          | 6832   |
| SYCP1     | synaptonemal complex protein 1                                  | 6847   |
| TAF4B     | TATA-box binding protein associated factor 4b                   | 6875   |
| TCEA2     | transcription elongation factor A2                              | 6919   |
| TCF7L2    | transcription factor 7 like 2                                   | 6934   |
| TERT      | telomerase reverse transcriptase                                | 7015   |
| TFDP2     | transcription factor Dp-2                                       | 7029   |

|           |                                                                           |        |
|-----------|---------------------------------------------------------------------------|--------|
| TIMP3     | TIMP metallopeptidase inhibitor 3                                         | 7078   |
| TLE4      | transducin like enhancer of split 4                                       | 7091   |
| TLR4      | toll like receptor 4                                                      | 7099   |
| TM7SF2    | transmembrane 7 superfamily member 2                                      | 7108   |
| TPD52     | tumor protein D52                                                         | 7163   |
| LINC01137 | long intergenic non-protein coding RNA 1137                               | 728431 |
| CCDC169   | coiled-coil domain containing 169                                         | 728591 |
| ZNF736    | zinc finger protein 736                                                   | 728927 |
| LOC729083 | long intergenic non-protein coding RNA 2158                               | 729083 |
| TNFRSF4   | TNF receptor superfamily member 4                                         | 7293   |
| CORO2A    | coronin 2A                                                                | 7464   |
| ZXDA      | zinc finger, X-linked, duplicated A                                       | 7789   |
| LAPTM5    | lysosomal protein transmembrane 5                                         | 7805   |
| FAM134A   | family with sequence similarity 134 member A                              | 79137  |
| MMP28     | matrix metallopeptidase 28                                                | 79148  |
| ALDH5A1   | aldehyde dehydrogenase 5 family member A1                                 | 7915   |
| HSD17B8   | hydroxysteroid 17-beta dehydrogenase 8                                    | 7923   |
| BHLHE41   | basic helix-loop-helix family member e41                                  | 79365  |
| SLC52A2   | solute carrier family 52 member 2                                         | 79581  |
| TMEM231   | transmembrane protein 231                                                 | 79583  |
| CALCA     | calcitonin related polypeptide alpha                                      | 796    |
| RNASEH2B  | ribonuclease H2 subunit B                                                 | 79621  |
| EFCAB1    | EF-hand calcium binding domain 1                                          | 79645  |
| SAP30L    | SAP30 like                                                                | 79685  |
| NSUN7     | NOP2/Sun RNA methyltransferase family member 7                            | 79730  |
| WDR78     | WD repeat domain 78                                                       | 79819  |
| SETD6     | SET domain containing 6                                                   | 79918  |
| UBXN8     | UBX domain protein 8                                                      | 7993   |
| MYCT1     | myc target 1                                                              | 80177  |
| RUBCNL    | RUN and cysteine rich domain containing beclin 1 interacting protein like | 80183  |

|          |                                                             |       |
|----------|-------------------------------------------------------------|-------|
| TMEM254  | transmembrane protein 254                                   | 80195 |
| HKDC1    | hexokinase domain containing 1                              | 80201 |
| ALPK1    | alpha kinase 1                                              | 80216 |
| CEP70    | centrosomal protein 70                                      | 80321 |
| PABPC1L  | poly(A) binding protein cytoplasmic 1 like                  | 80336 |
| WDR61    | WD repeat domain 61                                         | 80349 |
| SPX      | spexin hormone                                              | 80763 |
| CLPTM1L  | CLPTM1 like                                                 | 81037 |
| ANP32A   | acidic nuclear phosphoprotein 32 family member A            | 8125  |
| HM13     | histocompatibility minor 13                                 | 81502 |
| GDPD5    | glycerophosphodiester phosphodiesterase domain containing 5 | 81544 |
| TDRD3    | tudor domain containing 3                                   | 81550 |
| CANX     | calnexin                                                    | 821   |
| CAPS     | calcyphosine                                                | 828   |
| CAST     | calpastatin                                                 | 831   |
| AXIN1    | axin 1                                                      | 8312  |
| PITPNM3  | PITPNM family member 3                                      | 83394 |
| INO80B   | INO80 complex subunit B                                     | 83444 |
| ABHD11   | abhydrolase domain containing 11                            | 83451 |
| SH3BGRL2 | SH3 domain binding glutamate rich protein like 2            | 83699 |
| SETDB2   | SET domain bifurcated 2                                     | 83852 |
| SPATA9   | spermatogenesis associated 9                                | 83890 |
| RASSF4   | Ras association domain family member 4                      | 83937 |
| CCDC8    | coiled-coil domain containing 8                             | 83987 |
| FAM161A  | family with sequence similarity 161 member A                | 84140 |
| KAT8     | lysine acetyltransferase 8                                  | 84148 |
| LOXL4    | lysyl oxidase like 4                                        | 84171 |
| MFSD7    | major facilitator superfamily domain containing 7           | 84179 |
| ALKBH7   | alkB homolog 7                                              | 84266 |
| EFCAB2   | EF-hand calcium binding domain 2                            | 84288 |
| FAM213A  | family with sequence similarity 213 member A                | 84293 |

|          |                                                                        |       |
|----------|------------------------------------------------------------------------|-------|
| CCDC115  | coiled-coil domain containing 115                                      | 84317 |
| ZBED3    | zinc finger BED-type containing 3                                      | 84327 |
| CYSTM1   | cysteine rich transmembrane module containing 1                        | 84418 |
| ABLIM2   | actin binding LIM protein family member 2                              | 84448 |
| ZMAT1    | zinc finger matrin-type 1                                              | 84460 |
| PLPP5    | phospholipid phosphatase 5                                             | 84513 |
| FAXC     | failed axon connections homolog                                        | 84553 |
| SLITRK2  | SLIT and NTRK like family member 2                                     | 84631 |
| ACCS     | 1-aminocyclopropane-1-carboxylate synthase homolog (inactive)          | 84680 |
| PLEKHA8  | pleckstrin homology domain containing A8                               | 84725 |
| USP30    | ubiquitin specific peptidase 30                                        | 84749 |
| CDC42BPA | CDC42 binding protein kinase alpha                                     | 8476  |
| HIRIP3   | HIRA interacting protein 3                                             | 8479  |
| IL17RC   | interleukin 17 receptor C                                              | 84818 |
| SEMA7A   | semaphorin 7A (John Milton Hagen blood group)                          | 8482  |
| RPUSD4   | RNA pseudouridylate synthase domain containing 4                       | 84881 |
| POMGNT2  | protein O-linked mannose N-acetylglucosaminyltransferase 2 (beta 1,4-) | 84892 |
| ALG10    | ALG10, alpha-1,2-glucosyltransferase                                   | 84920 |
| TMEM209  | transmembrane protein 209                                              | 84928 |
| ZNRF1    | zinc and ring finger 1                                                 | 84937 |
| CGNL1    | cingulin like 1                                                        | 84952 |
| SYTL1    | synaptotagmin like 1                                                   | 84958 |
| FBXL20   | F-box and leucine rich repeat protein 20                               | 84961 |
| AJUBA    | ajuba LIM protein                                                      | 84962 |
| PNMA6A   | paraneoplastic Ma antigen family member 6A                             | 84968 |
| PHYKPL   | 5-phosphohydroxy-L-lysine phospho-lyase                                | 85007 |
| RHPN2    | rhophilin Rho GTPase binding protein 2                                 | 85415 |
| ZNF518B  | zinc finger protein 518B                                               | 85460 |

|         |                                                                 |       |
|---------|-----------------------------------------------------------------|-------|
| PDE8B   | phosphodiesterase 8B                                            | 8622  |
| HSD17B6 | hydroxysteroid 17-beta dehydrogenase 6                          | 8630  |
| RNASET2 | ribonuclease T2                                                 | 8635  |
| NCOA1   | nuclear receptor coactivator 1                                  | 8648  |
| ADAM15  | ADAM metallopeptidase domain 15                                 | 8751  |
| MPDZ    | multiple PDZ domain crumbs cell polarity complex component      | 8777  |
| PEX11A  | peroxisomal biogenesis factor 11 alpha                          | 8800  |
| INPP4B  | inositol polyphosphate-4-phosphatase type II B                  | 8821  |
| NRP2    | neuropilin 2                                                    | 8828  |
| PAPLN   | papilin, proteoglycan like sulfated glycoprotein                | 89932 |
| GLB1L2  | galactosidase beta 1 like 2                                     | 89944 |
| UBE3D   | ubiquitin protein ligase E3D                                    | 90025 |
| PHLDB2  | pleckstrin homology like domain family B member 2               | 90102 |
| C9orf69 | chromosome 9 open reading frame 69                              | 90120 |
| FRMD7   | FERM domain containing 7                                        | 90167 |
| SYS1    | SYS1, golgi trafficking protein                                 | 90196 |
| ZNF468  | zinc finger protein 468                                         | 90333 |
| FAM110B | family with sequence similarity 110 member B                    | 90362 |
| BMF     | Bcl2 modifying factor                                           | 90427 |
| YIF1B   | Yip1 interacting factor homolog B, membrane trafficking protein | 90522 |
| N4BP2L1 | NEDD4 binding protein 2 like 1                                  | 90634 |
| CEP95   | centrosomal protein 95                                          | 90799 |
| ZNF598  | zinc finger protein 598                                         | 90850 |
| ADCK2   | aarF domain containing kinase 2                                 | 90956 |
| GUSBP11 | glucuronidase, beta pseudogene 11                               | 91316 |
| DYRK1B  | dual specificity tyrosine phosphorylation regulated kinase 1B   | 9149  |
| SMDT1   | single-pass membrane protein with aspartate rich tail 1         | 91689 |
| ALKBH8  | alkB homolog 8, tRNA methyltransferase                          | 91801 |

|          |                                                             |       |
|----------|-------------------------------------------------------------|-------|
| C11orf52 | chromosome 11 open reading frame 52                         | 91894 |
| TTC30A   | tetratricopeptide repeat domain 30A                         | 92104 |
| ATP6AP1L | ATPase H <sup>+</sup> transporting accessory protein 1 like | 92270 |
| CHMP4C   | charged multivesicular body protein 4C                      | 92421 |
| HELB     | DNA helicase B                                              | 92797 |
| NT5C1B   | 5'-nucleotidase, cytosolic IB                               | 93034 |
| DMKN     | dermokine                                                   | 93099 |
| PIGM     | phosphatidylinositol glycan anchor biosynthesis class M     | 93183 |
| IGSF8    | immunoglobulin superfamily member 8                         | 93185 |
| MVB12A   | multivesicular body subunit 12A                             | 93343 |
| SDR42E1  | short chain dehydrogenase/reductase family 42E, member 1    | 93517 |
| TRMT10A  | tRNA methyltransferase 10A                                  | 93587 |
| RAB28    | RAB28, member RAS oncogene family                           | 9364  |
| RECQL5   | RecQ like helicase 5                                        | 9400  |
| EPSTI1   | epithelial stromal interaction 1                            | 94240 |
| TP53INP1 | tumor protein p53 inducible nuclear protein 1               | 94241 |
| PGS1     | phosphatidylglycerophosphate synthase 1                     | 9489  |
| CD40     | CD40 molecule                                               | 958   |
| N4BP1    | NEDD4 binding protein 1                                     | 9683  |
| VGLL4    | vestigial like family member 4                              | 9686  |
| CEP57    | centrosomal protein 57                                      | 9702  |
| USP6NL   | USP6 N-terminal like                                        | 9712  |
| ARHGAP32 | Rho GTPase activating protein 32                            | 9743  |
| ZFYVE16  | zinc finger FYVE-type containing 16                         | 9765  |
| MRPL19   | mitochondrial ribosomal protein L19                         | 9801  |
| HEPH     | hephaestin                                                  | 9843  |
