# Supplementary figures and images for: An Investigation about Gene Modules Associated with hDPSC Differentiation for Adolescents
Source: Hindawi journal article supplement (doi:10.1155/2019/8913287), 2019-04-04

S3 Fig. Hierarchical clustering of the six samples.

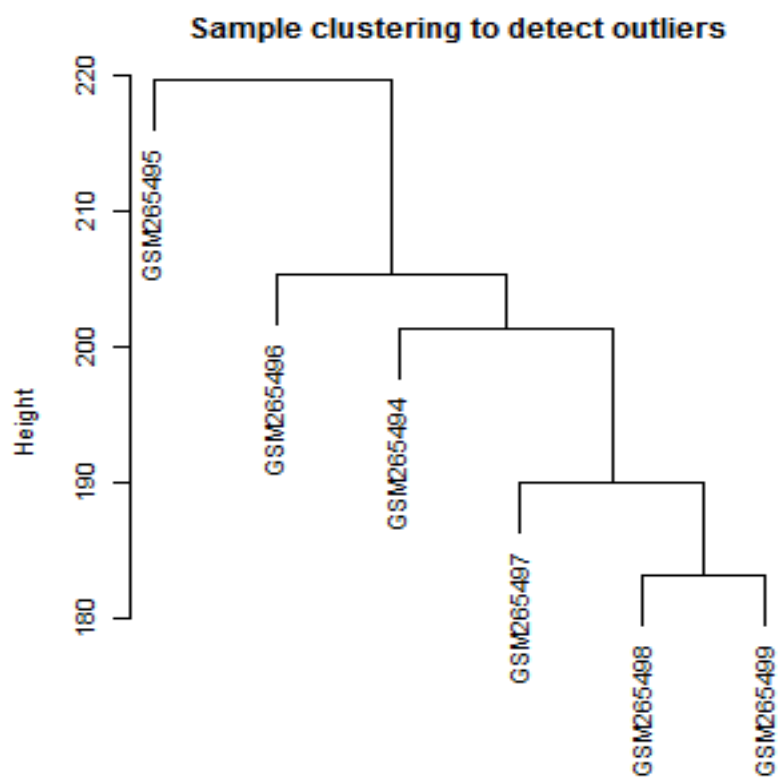

Supplement: f1 [file 8913287.f1.zip]

**S4 Fig. Gene significance across modules.**

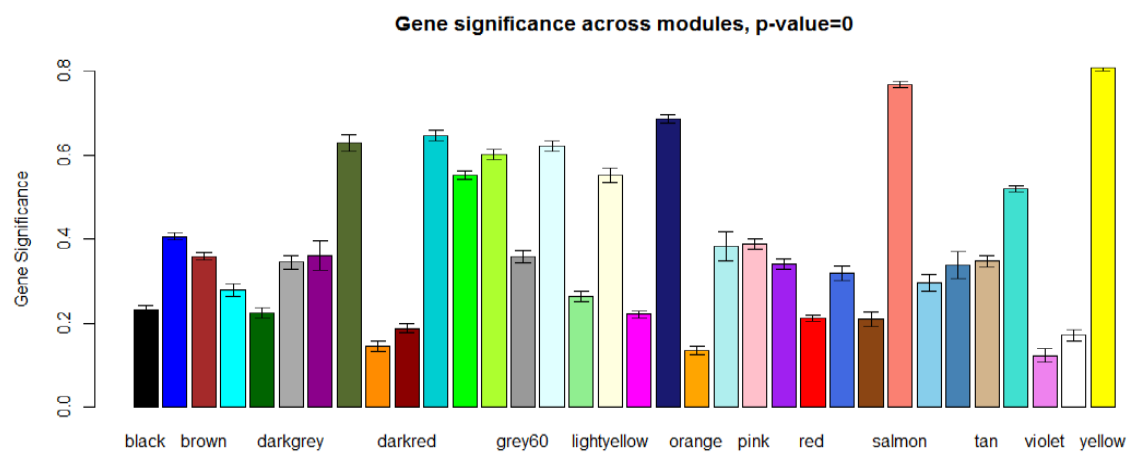

Supplement: f1 [file 8913287.f1.zip]
